# Supplementary material for: Synergistic Activity of Colistin/Fosfomycin Combination against Carbapenemase-Producing Klebsiella pneumoniae in an In Vitro Pharmacokinetic/Pharmacodynamic Model
Source: Hindawi journal article supplement (doi:10.1155/2018/5720417), 2018-01-01
Supplement: f1 [file 5720417.f1.pdf]

**TABLE S1 Primer sets for  $\beta$ -lactamases used in the PCR.**

| <b>Genes</b>       | <b>Sequence of primer</b> |
|--------------------|---------------------------|
| <i>bla-IMP-F</i>   | CTACCGCAGCAGAGTCTTTG      |
| <i>bla-IMP-R</i>   | AACCAGTTTTGCCTTACCAT      |
| <i>bla-VIM-F</i>   | AGTGGTGAGTATCCGACAG       |
| <i>bla-VIM-R</i>   | ATGAAAGTGCGTGGAGAC        |
| <i>bla-SME-F</i>   | AACGGCTTCATTTTTGTTTAG     |
| <i>bla-SME-R</i>   | GCTTCCGCAATAGTTTTATCA     |
| <i>bla-KPC-F</i>   | TGTCACTGTATCGCCGTC        |
| <i>bla-KPC-R</i>   | CTCAGTGCTCTACAGAAAACC     |
| <i>bla-IMI-F</i>   | CCATTCACCCATCACAAC        |
| <i>bla-IMI-R</i>   | CTACCGCATAATCATTGTC       |
| <i>bla-SHV-F</i>   | TGCGCAAGCTGCTGACCAGC      |
| <i>bla-SHV-R</i>   | TTAGCGYTGCCAGTGCTCGA      |
| <i>bla-GES-F</i>   | ATGCGCTTCATTCACGCAC       |
| <i>bla-GES-R</i>   | CTATTTGTCCGTGCTCAGG       |
| <i>bla-VEB-F</i>   | GCGGTAATTAACCAGA          |
| <i>bla-VEB-R</i>   | GCCTATGAGCCAGTGTT         |
| <i>bla-OXA-1F</i>  | CTGTTGTTTGGGTTTCGCAAG     |
| <i>bla-OXA-1R</i>  | CTTGGCTTTTATGCTTGATG      |
| <i>bla-OXA-2F</i>  | CAGGCGCYGTTTCGYGATGAGTT   |
| <i>bla-OXA-2R</i>  | GCCYTCTATCCAGTAATCGCC     |
| <i>bla-OXA-10F</i> | GTCTTTCRAGTACGGCATT       |
| <i>bla-OXA-10R</i> | GATTTTCTTAGCGGCAACTTA     |
| <i>bla-OXA-48F</i> | ATGCGTGTATTAGCCTTATCGGCT  |
| <i>bla-OXA-48R</i> | CTAGGGAATAATTTTTCTGTTTGAG |
| <i>bla-NDM-F</i>   | GCCAGCTCGCACCGAAT         |
| <i>bla-NDM-R</i>   | GAACGCCGCACCAAACG         |
| <i>bla-CTX-F</i>   | CGYTTTSCRATGTGCAG         |
| <i>bla-CTX-R</i>   | ACCGCRATATCRTTGGT         |
| <i>bla-AmpC1</i>   | ATGATGAAAAAATCGTTATGC     |
| <i>bla-AmpC2</i>   | TTGCAGCTTTTCAAGAATGCGC    |
